# Supplementary material for: Synthesis and In Vitro Evaluation of Gold Nanoparticles Functionalized with Thiol Ligands for Robust Radiolabeling with 99mTc
Source: MDPI journal article supplement (doi:10.3390/nano11092406), 2021-09-15
Supplement: s1 [file s1]

*Supplementary Materials*

# **Synthesis and In Vitro Evaluation of Gold Nanoparticles Functionalized with Thiol Ligands for Robust Radiolabeling with $^{99m}\text{Tc}$**

**Adamantia Apostolopoulou <sup>1,2</sup>, Aristeidis Chiotellis <sup>1</sup>, Evangelia-Alexandra Salvanou <sup>1</sup>, Konstantina Makrypidi <sup>1</sup>, Charalampos Tsoukalas <sup>1</sup>, Fotis Kapiris <sup>1</sup>, Maria Paravatou-Petsotas <sup>1</sup>, Minas Papadopoulos <sup>1</sup>, Ioannis C. Pirmettis <sup>1</sup>, Przemysław Koźmiński <sup>3</sup> and Penelope Bouziotis <sup>1,\*</sup>**

<sup>1</sup> National Center for Scientific Research "Demokritos", Institute of Nuclear & Radiological Sciences & Technology, Energy & Safety, 15341 Agia Paraskevi, Athens, Greece; madoapostol@gmail.com (A.A.); achiotel@rrp.demokritos.gr (A.C.); salvanou@rrp.demokritos.gr (E.-A.S.); kmakrypidi@gmail.com (K.M.); ctsooukal@rrp.demokritos.gr (C.T.); fotiskp@gmail.com (F.K.); mparavatou@rrp.demokritos.gr (M.P.-P.); mspap@rrp.demokritos.gr (M.P.); ipirme@rrp.demokritos.gr (I.C.P.); bouzioti@rrp.demokritos.gr (P.B.)

<sup>2</sup> Department of Pharmacy, National and Kapodistrian University of Athens, Panepistimiopolis Zographou, 15771 Athens, Greece

<sup>3</sup> Centre of Radiochemistry and Nuclear Chemistry, Institute of Nuclear Chemistry and Technology, Dorod-na 16 Str., 03-195 Warsaw, Poland; p.kozminski@ichtj.waw.pl

\* Correspondence: Correspondence: bouzioti@rrp.demokritos.gr; Tel.: +30-2106503687

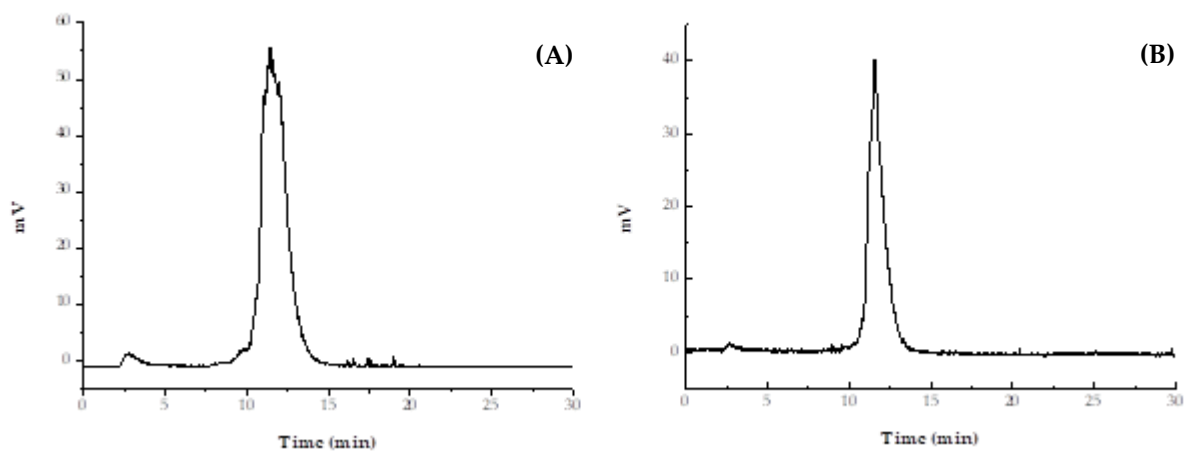

**Figure S1.** HPLC Diagrams representing the radiochemical purity of  $[^{99m}\text{Tc}]\text{Tc-Au}^{(2)}\text{L}_1$  at (A) 1 h and (B) 24 h post-incubation

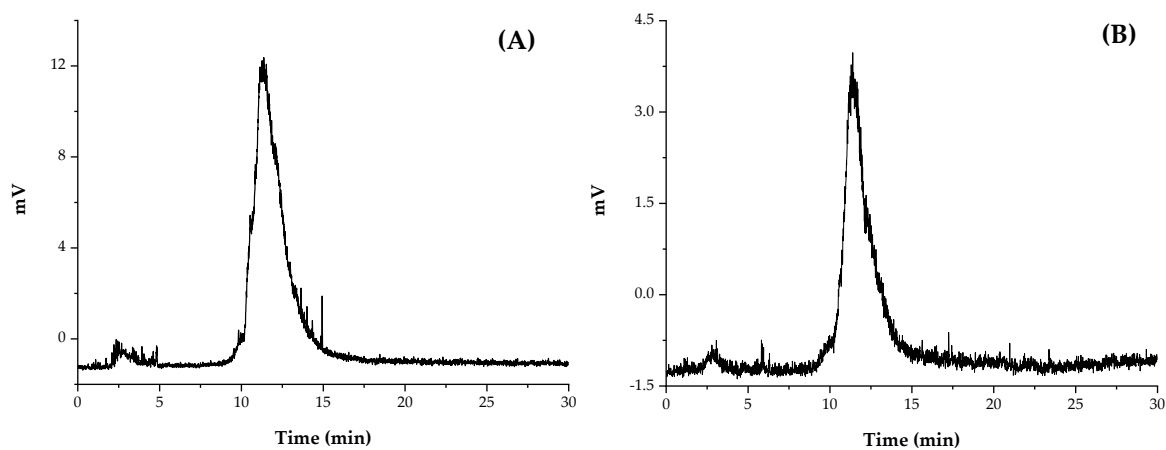

**Figure S2.** HPLC Diagrams representing the *in vitro* stability of  $[^{99m}\text{Tc}]\text{Tc-Au}^{(2)}\text{L}_1$  in cysteine solution at (A) 1 h and (B) 24 h post-incubation

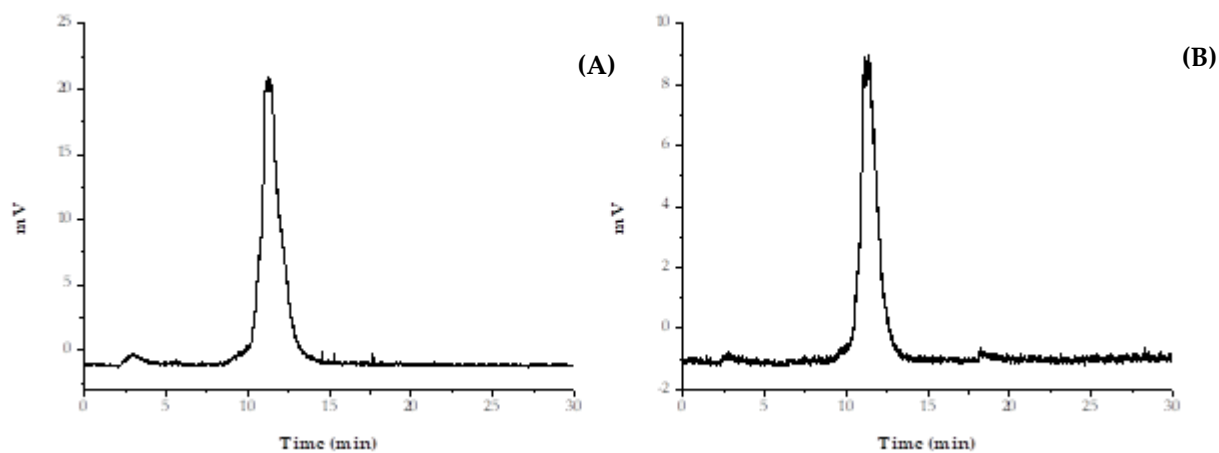

**Figure S3.** HPLC Diagrams representing the *in vitro* stability of  $[^{99m}\text{Tc}]\text{Tc-Au}^{(2)}\text{L}_1$  in histidine solution at (A) 1 h and (B) 24 h post-incubation

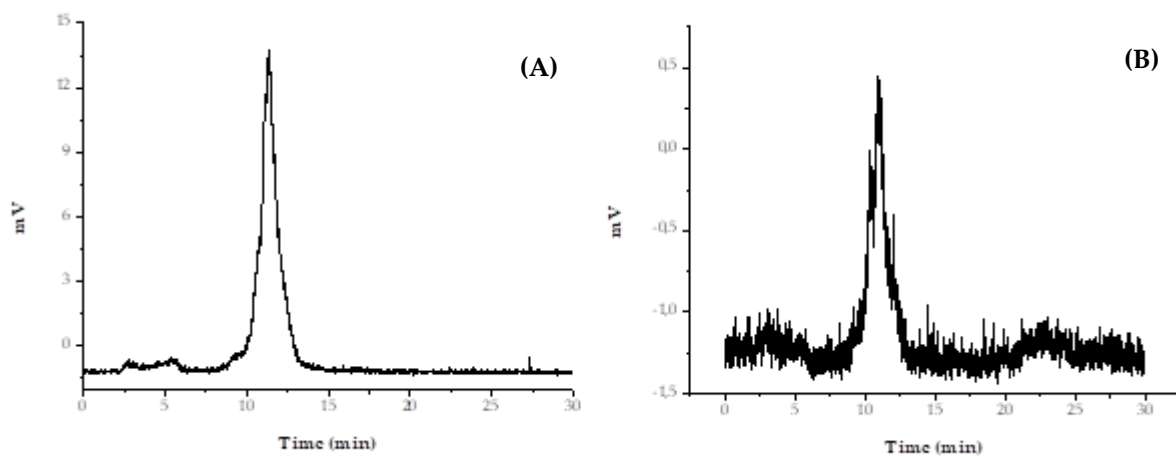

**Figure S4.** HPLC Diagrams representing the *in vitro* stability of  $[^{99m}\text{Tc}]\text{Tc-Au}^{(2)}\text{L}_1$  in human serum at (A) 1 h and (B) 24 h post-incubation

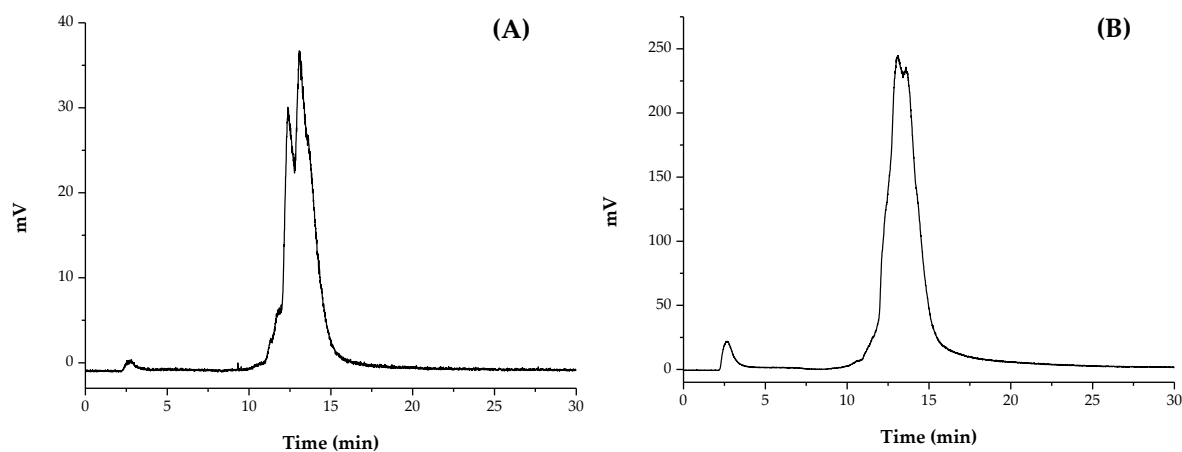

**Figure 5.** HPLC Diagrams representing the radiochemical purity of  $[^{99m}\text{Tc}]\text{Tc-Au}^{(2)}\text{L}_2$  at (A) 1 h and (B) 24 h post-incubation.

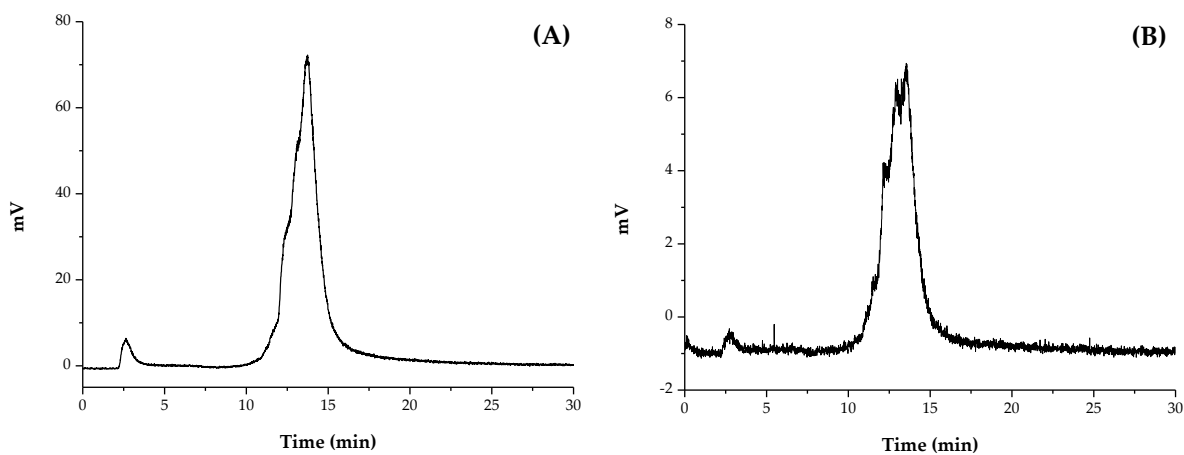

**Figure S6.** HPLC Diagrams representing the *in vitro* stability of  $[^{99m}\text{Tc}]\text{Tc-Au}^{(2)}\text{L}_2$  in cysteine solution at (A) 1 h and (B) 24 h post-incubation

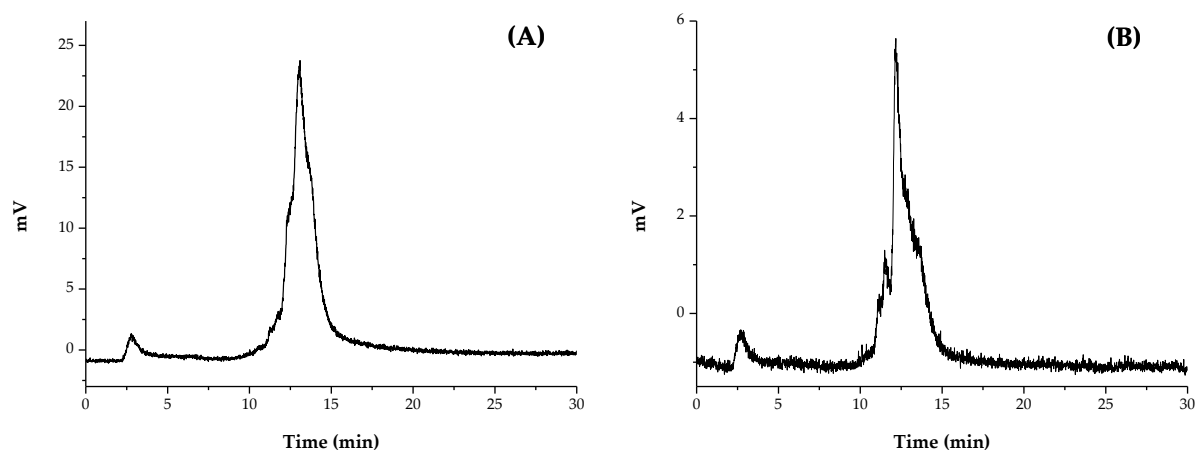

**Figure S7.** HPLC Diagrams representing the *in vitro* stability of  $[^{99m}\text{Tc}]\text{Tc-Au}^{(2)}\text{L}_2$  in histidine solution at (A) 1 h and (B) 24 h post-incubation

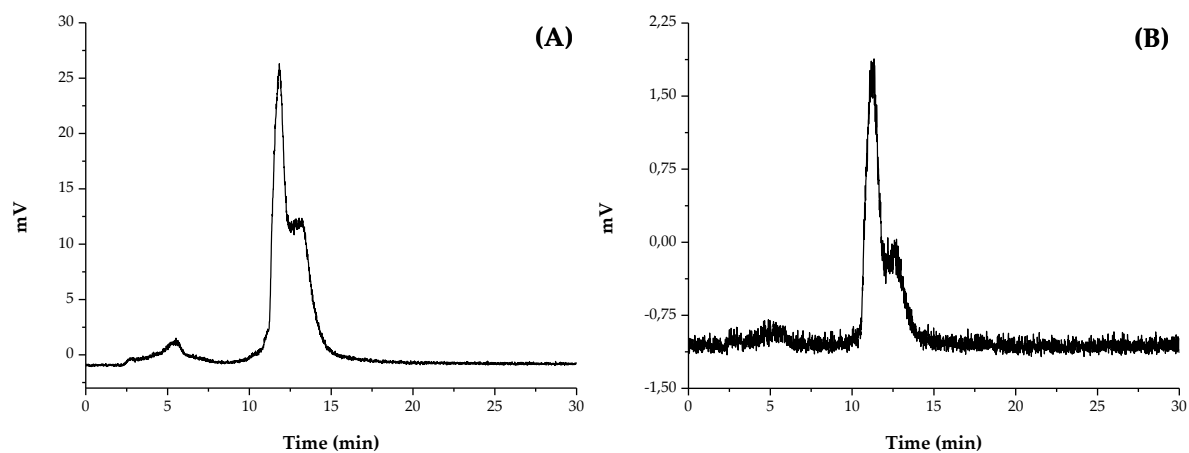

**Figure S8.** HPLC Diagrams representing the *in vitro* stability of  $[^{99m}\text{Tc}]\text{Tc-Au}^{(2)}\text{L}_2$  in human serum at (A) 1 h and (B) 24 h post-incubation

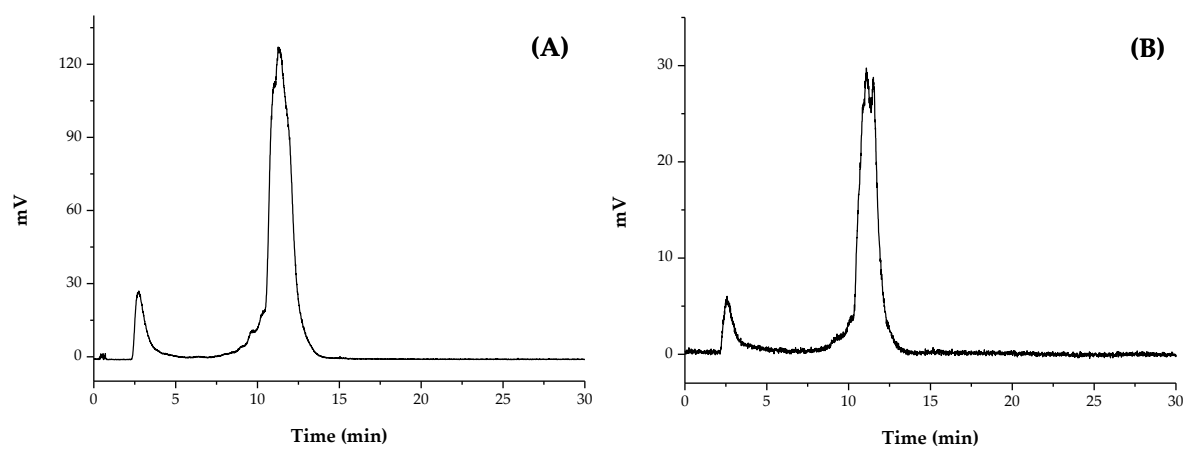

**Figure S9.** HPLC Diagrams representing the radiochemical purity of  $[^{99m}\text{Tc}]\text{Tc-Au}^{(20)}\text{L}_1$  at (A) 1 h and (B) 24 h post-incubation

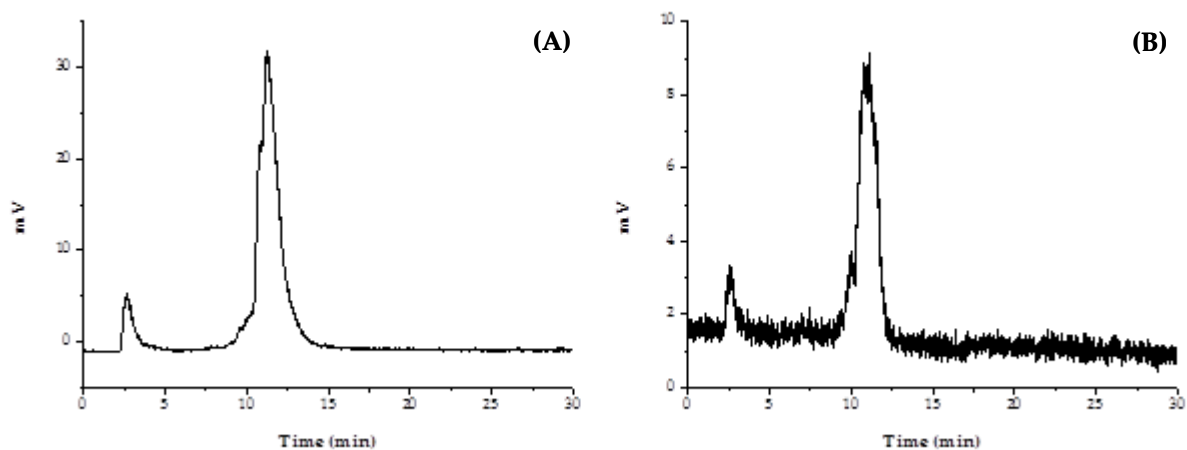

**Figure S10.** HPLC Diagrams representing the *in vitro* stability of  $[^{99m}\text{Tc}]\text{Tc-Au}^{(20)}\text{L}_1$  in cysteine solution at (A) 1 h and (B) 24 h post-incubation

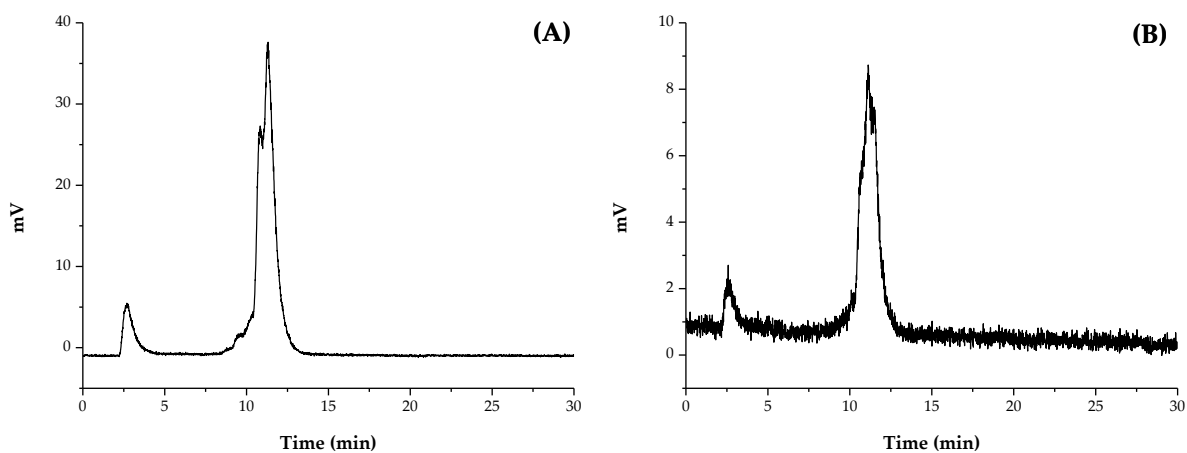

**Figure S11.** HPLC Diagrams representing the *in vitro* stability of  $[^{99m}\text{Tc}]\text{Tc-Au}^{(20)}\text{L}_1$  in histidine solution at (A) 1 h and (B) 24 h post-incubation

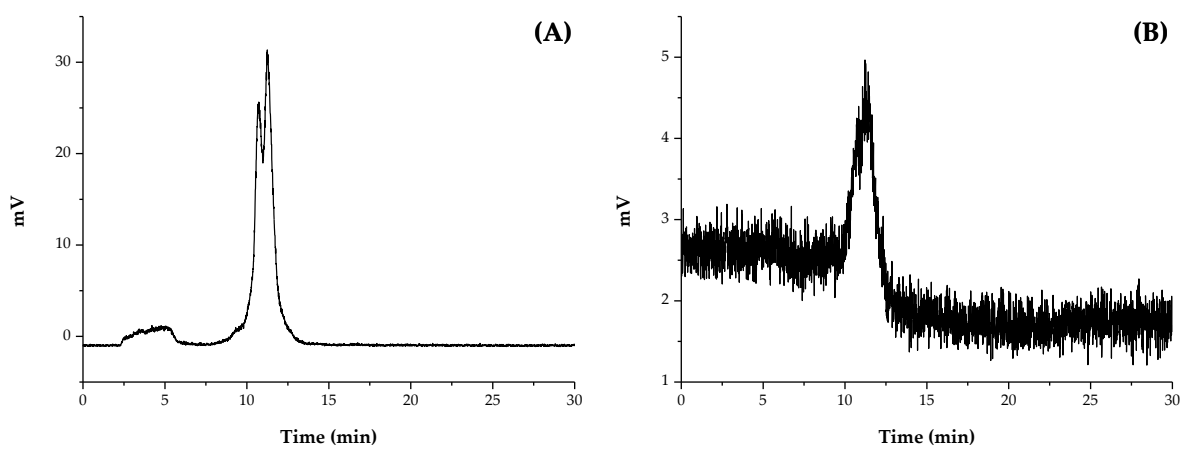

**Figure S12.** HPLC Diagrams representing the *in vitro* stability of  $[^{99m}\text{Tc}]\text{Tc-Au}^{(20)}\text{L}_1$  in human serum at (A) 1 h and (B) 24 h post-incubation

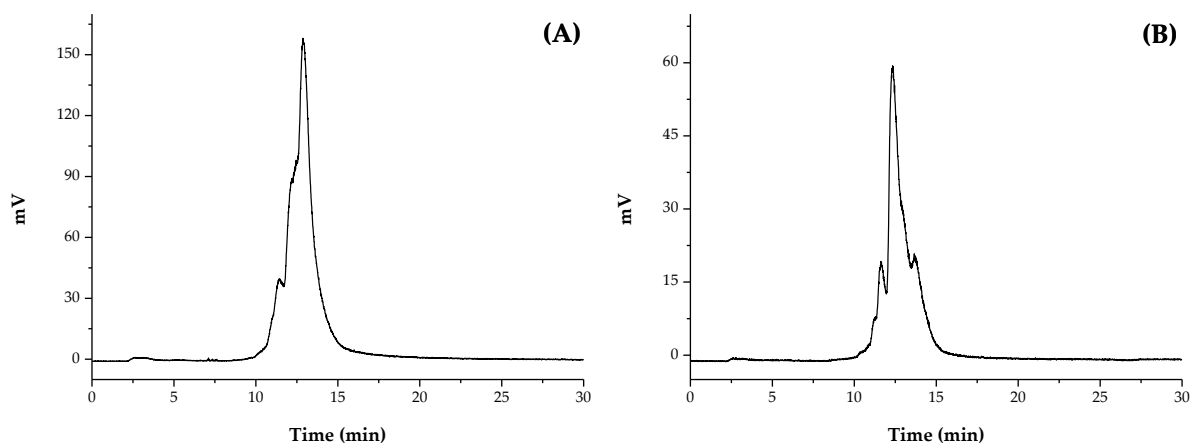

**Figure S13.** HPLC Diagrams representing the radiochemical purity of  $[^{99m}\text{Tc}]\text{Tc-Au}^{(20)}\text{L}_2$  at (A) 1 h and (B) 24 h post-incubation

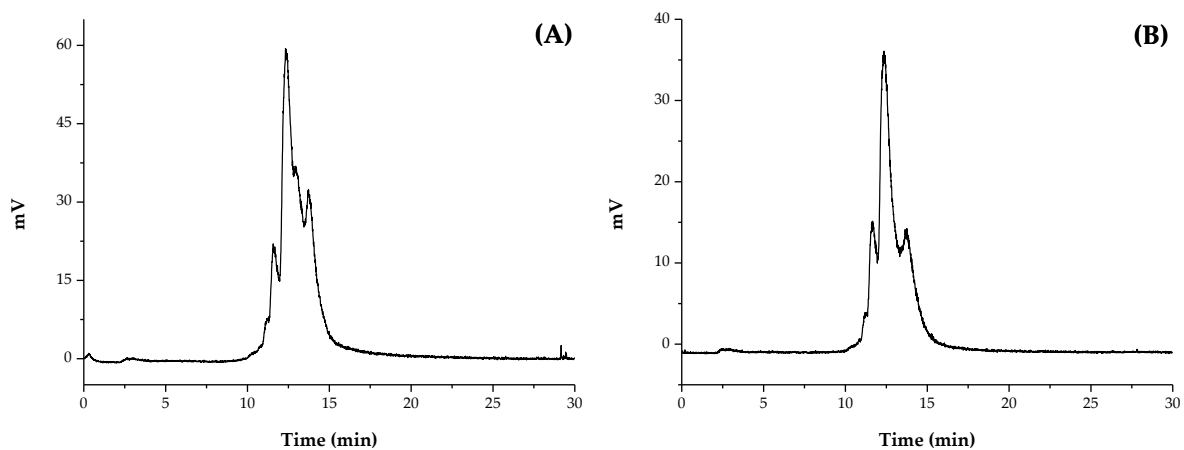

**Figure S14.** HPLC Diagrams representing the *in vitro* stability of  $[^{99m}\text{Tc}]\text{Tc-Au}^{(20)}\text{L}_2$  in cysteine solution at (A) 1 h and (B) 24 h post-incubation

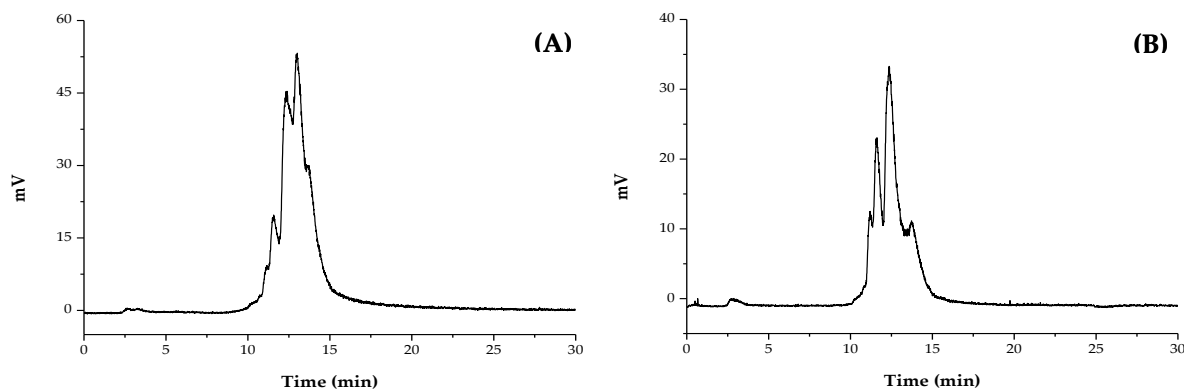

**Figure S15.** HPLC Diagrams representing the *in vitro* stability of  $[^{99m}\text{Tc}]\text{Tc-Au}^{(20)}\text{L}_2$  in histidine solution at (A) 1 h and (B) 24 h post-incubation

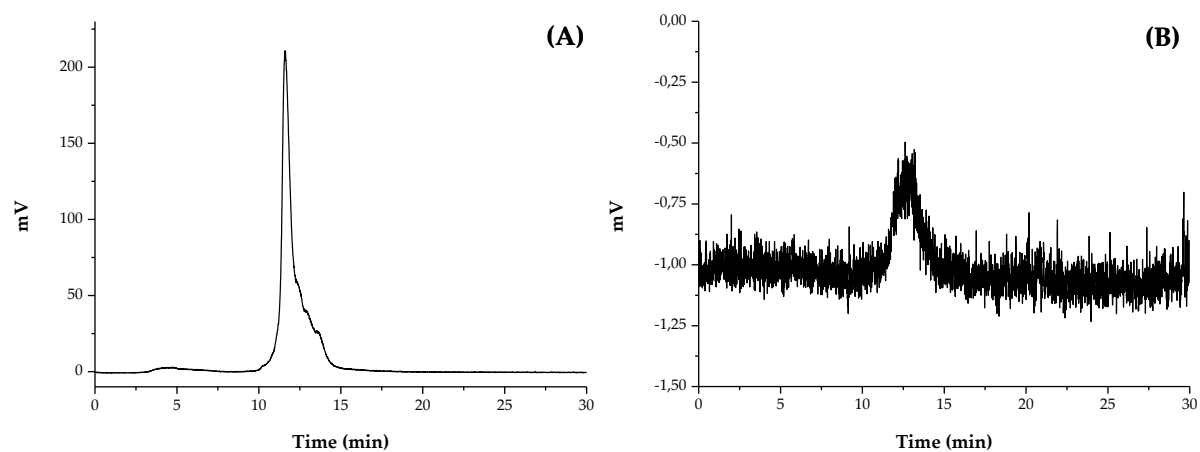

**Figure S16.** HPLC Diagrams representing the *in vitro* stability of  $[^{99m}\text{Tc}]\text{Tc-Au}^{(20)}\text{L}_2$  in histidine solution at (A) 1 h and (B) 24 h post-incubation

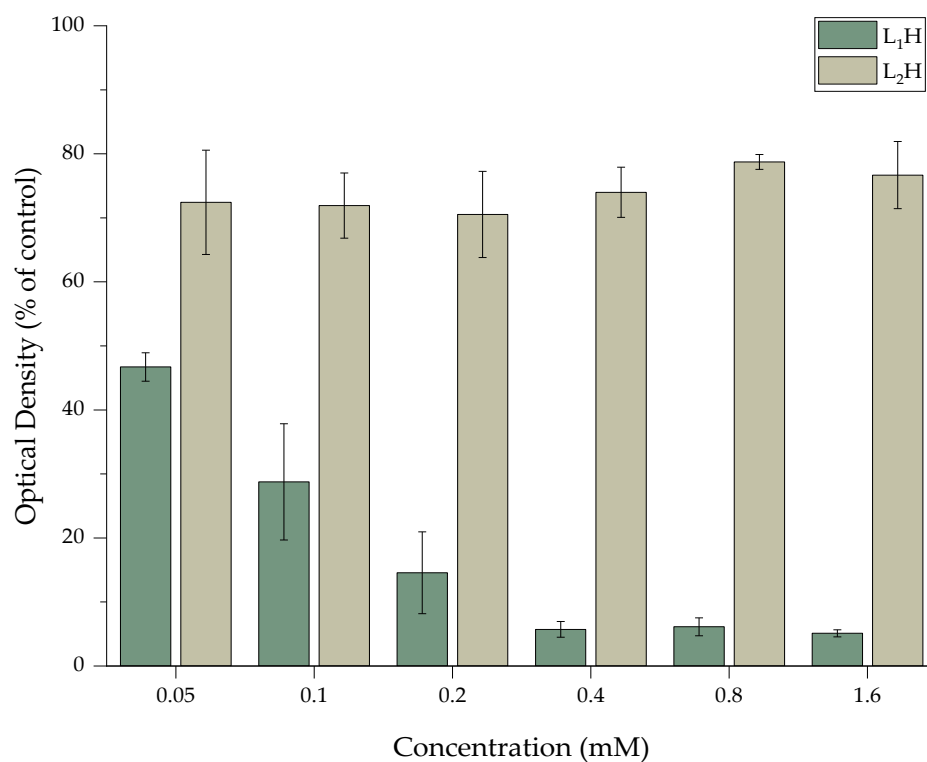

**Figure S17.** MTT Assay of 4T1 cells treated with different concentrations of  $\text{L}_1\text{H}$  and  $\text{L}_2\text{H}$ . The tested ligand concentrations correspond to the concentrations of the AuNPs used in the MTT Assay.
